# Supplementary material
Source: bioRxiv or medRxiv preprint supplement (https://www.biorxiv.org/highwire/filestream/43175/field_highwire_adjunct_files/7/087247-8.pdf)
Supplement: Supplementary file [file 087247-8.pdf]

BlpSRH<sup>D39</sup>

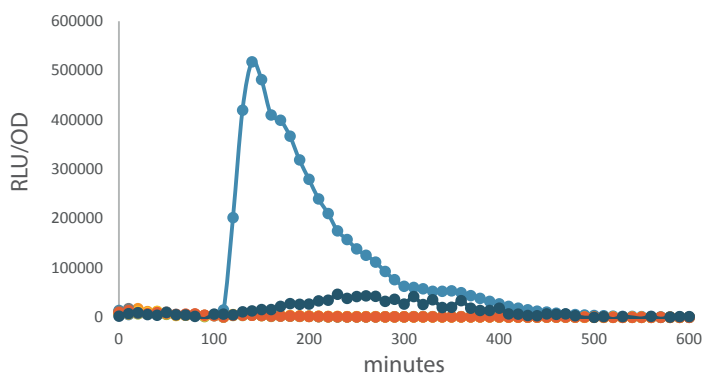

BlpSRH<sup>PMEN-2</sup>

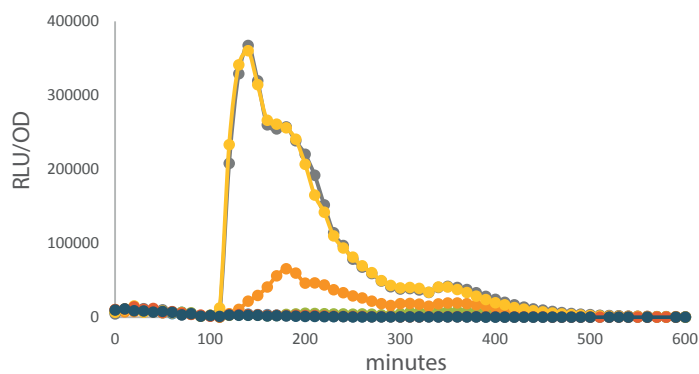

BlpSRH<sup>Hermans-33</sup>

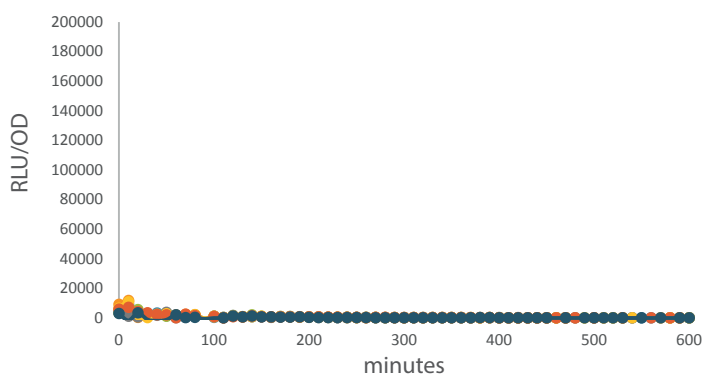

BlpSRH<sup>Hermans-1012</sup>

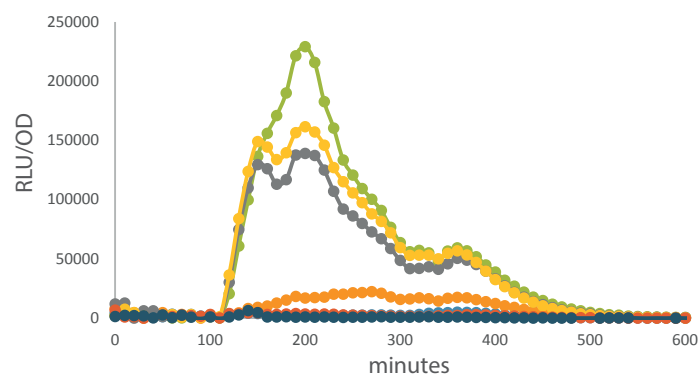

BlpSRH<sup>PMEN-14</sup>

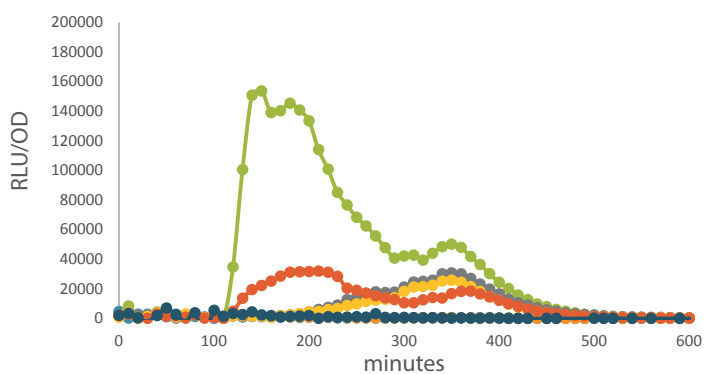

BlpSRH<sup>PMEN-18</sup>

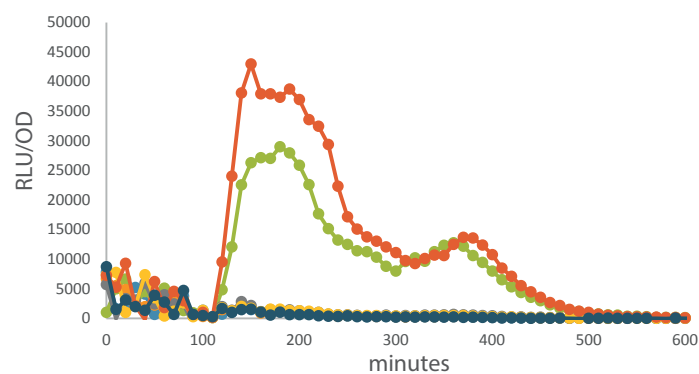

● control ● Alpha ● Charlie ● Delta ● Echo ● Foxtrot ● Golf
